# Supplementary material
Source: PubMed Central journal article supplement (PMC2581467)

**Stereochemistry Modulates Stability of Reduced Inter-Strand Cross-Links Arising From *R*- and *S*- $\alpha$ -CH<sub>3</sub>- $\gamma$ -OH-1,*N*<sup>2</sup>-propano-2'-Deoxyguanosine in the 5'-CpG-3' DNA Sequence**

Supporting Information

Young-Jin Cho, Ivan D. Kozekov, Thomas M. Harris, Carmelo J. Rizzo, and Michael P. Stone\*

Department of Chemistry, Center in Molecular Toxicology, Vanderbilt-Ingram Cancer Center,  
Vanderbilt University, Nashville, Tennessee 37235

\*Author to whom correspondence should be addressed. Telephone 615-322-2589; FAX 615-322-7591; email michael.p.stone@vanderbilt.edu

Running Title: Crotonaldehyde Interstrand DNA Cross-Link Structure

**Table S1.** Chemical Shifts (ppm) of Non-Exchangeable Protons in the Oligodeoxynucleotide 5'-d(GCTAGCXAGTCC)-3'•5'-(GGACTCYYCTAGC)-3' Containing the 5'-Cp-*N*<sup>2</sup>-dG-3'-*R*-( $\alpha$ )-CH<sub>3</sub>-propyl-5'-Cp-*N*<sup>2</sup>-dG-3' Inter-strand Cross-link **8a**.

| Nucleotide      | H1'  | H2'  | H2'' | H3'  | H4'  | H5'  | H5'' | H6/H8 | CH <sub>3</sub> /H5 |
|-----------------|------|------|------|------|------|------|------|-------|---------------------|
| G <sup>1</sup>  | 6.02 | 2.68 | 2.79 | 4.85 | 4.26 | 3.75 | n.a. | 7.99  |                     |
| C <sup>2</sup>  | 6.06 | 2.15 | 2.53 | 4.83 | 4.26 | 4.16 | 4.21 | 7.55  | 5.40                |
| T <sup>3</sup>  | 5.58 | 2.16 | 2.43 | 4.88 | 4.15 | 4.09 | 4.10 | 7.43  | 1.69                |
| A <sup>4</sup>  | 6.03 | 2.75 | 2.90 | 5.05 | 4.41 | 4.05 | 4.15 | 8.22  |                     |
| G <sup>5</sup>  | 5.70 | 2.44 | 2.59 | 4.95 | 4.35 | 4.22 | 4.18 | 7.66  |                     |
| C <sup>6</sup>  | 5.48 | 1.21 | 1.83 | 4.69 | 4.01 | n.a. | 4.18 | 7.07  | 5.17                |
| X <sup>7</sup>  | 5.47 | 2.78 | 2.78 | 4.97 | 4.32 | 3.92 | 4.01 | 7.84  |                     |
| A <sup>8</sup>  | 6.00 | 2.66 | 2.90 | 5.01 | 4.34 | 4.16 | 4.18 | 8.08  |                     |
| G <sup>9</sup>  | 5.78 | 2.42 | 2.68 | 4.86 | 4.33 | 4.18 | 4.21 | 7.53  |                     |
| T <sup>10</sup> | 6.01 | 2.11 | 2.50 | 4.83 | 4.20 | 4.12 | 4.23 | 7.20  | 1.26                |
| C <sup>11</sup> | 6.09 | 2.24 | 2.49 | 4.84 | 4.17 | 4.09 | 4.06 | 7.60  | 5.70                |
| C <sup>12</sup> | 6.24 | 2.29 | 2.31 | 4.56 | 4.06 | 4.26 | 4.17 | 7.70  | 5.81                |
|                 |      |      |      |      |      |      |      |       |                     |
| G <sup>13</sup> | 5.64 | 2.47 | 2.64 | 4.81 | 4.17 | 3.66 | n.a. | 7.82  |                     |
| G <sup>14</sup> | 5.57 | 2.71 | 2.79 | 5.02 | 4.37 | 4.06 | 4.14 | 7.86  |                     |
| A <sup>15</sup> | 6.27 | 2.75 | 2.92 | 5.06 | 4.50 | 4.20 | 4.25 | 8.22  |                     |
| C <sup>16</sup> | 5.81 | 1.96 | 2.47 | 4.66 | 4.22 | 4.18 | 4.33 | 7.29  | 5.22                |
| T <sup>17</sup> | 6.03 | 2.09 | 2.43 | 4.85 | 4.18 | 4.06 | 4.09 | 7.37  | 1.50                |
| C <sup>18</sup> | 5.49 | 1.65 | 2.10 | 4.79 | 4.01 | 4.03 | 4.08 | 7.28  | 5.54                |
| Y <sup>19</sup> | 6.00 | 2.81 | 2.69 | 5.00 | 4.39 | 4.04 | 4.07 | 7.94  |                     |

|                       |      |      |      |      |      |      |      |      |      |
|-----------------------|------|------|------|------|------|------|------|------|------|
| <b>C<sup>20</sup></b> | 5.84 | 1.98 | 2.46 | 4.67 | 4.17 | 4.17 | 4.28 | 7.43 | 5.39 |
| <b>T<sup>21</sup></b> | 5.56 | 2.08 | 2.39 | 4.84 | 4.11 | 4.03 | 4.39 | 7.40 | 1.69 |
| <b>A<sup>22</sup></b> | 6.02 | 2.73 | 2.87 | 5.03 | 4.38 | 4.03 | 4.11 | 8.21 |      |
| <b>G<sup>23</sup></b> | 5.81 | 2.47 | 2.63 | 4.93 | 4.35 | 4.18 | 4.22 | 7.68 |      |
| <b>C<sup>24</sup></b> | 6.12 | 2.13 | 2.20 | 4.46 | 4.22 | 4.03 | 4.26 | 7.40 | 5.36 |

Assignments of the 5'-Cp-*N*<sup>2</sup>-dG-3'-*R*-( $\alpha$ )-CH<sub>3</sub>-Propyl-5'-Cp-*N*<sup>2</sup>-dG-3' Inter-strand Cross-link **8a**

Protons:

| <b>Proton</b>                                        | <b>Chemical Shift (ppm)</b> |
|------------------------------------------------------|-----------------------------|
| <b>X<sup>7</sup> H<sub><math>\alpha</math></sub></b> | 3.82                        |
| <b>CH<sub>3</sub></b>                                | 1.03                        |
| <b>H<sub><math>\beta</math>1</sub></b>               | 1.82                        |
| <b>H<sub><math>\beta</math>2</sub></b>               | 1.63                        |
| <b>H<sub><math>\gamma</math>1</sub></b>              | 3.71                        |
| <b>H<sub><math>\gamma</math>2</sub></b>              | 2.82                        |

**Table S2.** Chemical Shifts (ppm) of Non-Exchangeable Protons in the Oligodeoxynucleotide 5'-d(GCTAGCXAGTCC)-3'•5'-(GGACTCYYCTAGC)-3' Containing the 5'-Cp-*N*<sup>2</sup>-dG-3'-*S*-( $\alpha$ )-CH<sub>3</sub>-propyl-5'-Cp-*N*<sup>2</sup>-dG-3' Inter-strand Cross-link **8b**.

| Nucleotide      | H1'  | H2'  | H2'' | H3'  | H4'  | H5'  | H5'' | H6/H8 | CH <sub>3</sub> /H5 |
|-----------------|------|------|------|------|------|------|------|-------|---------------------|
| G <sup>1</sup>  | 6.00 | 2.67 | 2.77 | 4.84 | 4.26 | 3.73 | n.a. | 7.98  |                     |
| C <sup>2</sup>  | 6.05 | 2.14 | 2.51 | 4.82 | 4.25 | 4.20 | 4.15 | 7.54  | 5.40                |
| T <sup>3</sup>  | 5.55 | 2.15 | 2.41 | 4.87 | 4.13 | n.a. | n.a. | 7.42  | 1.68                |
| A <sup>4</sup>  | 6.01 | 2.74 | 2.90 | 5.04 | 4.40 | 4.04 | 4.14 | 8.21  |                     |
| G <sup>5</sup>  | 5.68 | 2.44 | 2.59 | 4.94 | 4.35 | 4.18 | n.a. | 7.65  |                     |
| C <sup>6</sup>  | 5.49 | 1.33 | 2.00 | 4.71 | 3.99 | 4.20 | 4.04 | 7.07  | 5.19                |
| X <sup>7</sup>  | 5.78 | 2.73 | 2.81 | 4.99 | 4.33 | 3.96 | 4.04 | 7.84  |                     |
| A <sup>8</sup>  | 5.86 | 2.51 | 2.86 | 4.99 | 4.19 | 4.19 | 4.15 | 8.00  |                     |
| G <sup>9</sup>  | 5.78 | 2.39 | 2.66 | 4.84 | 4.33 | n.a. | n.a. | 7.48  |                     |
| T <sup>10</sup> | 6.01 | 2.10 | 2.49 | 4.82 | 4.20 | 4.12 | n.a. | 7.20  | 1.23                |
| C <sup>11</sup> | 6.09 | 2.23 | 2.48 | 4.84 | 4.17 | 4.08 | n.a. | 7.60  | 5.70                |
| C <sup>12</sup> | 6.23 | 2.29 | n.a. | 4.55 | 4.05 | 4.26 | 4.17 | 7.71  | 5.81                |
|                 |      |      |      |      |      |      |      |       |                     |
| G <sup>13</sup> | 5.63 | 2.44 | 2.61 | 4.80 | 4.16 | 3.65 | n.a. | 7.80  |                     |
| G <sup>14</sup> | 5.55 | 2.70 | 2.78 | 5.01 | 4.36 | 4.05 | 4.13 | 7.85  |                     |
| A <sup>15</sup> | 6.26 | 2.75 | 2.91 | 5.05 | 4.50 | 4.19 | 4.24 | 8.22  |                     |
| C <sup>16</sup> | 5.80 | 1.99 | 2.50 | 4.65 | 4.23 | 4.33 | 4.19 | 7.27  | 5.20                |
| T <sup>17</sup> | 6.02 | 2.14 | 2.51 | 4.86 | 4.20 | n.a. | n.a. | 7.38  | 1.49                |
| C <sup>18</sup> | 5.61 | 1.73 | 2.30 | 4.83 | 4.03 | n.a. | n.a. | 7.28  | 5.52                |
| Y <sup>19</sup> | 5.96 | 2.76 | 2.64 | 4.99 | 4.39 | 4.09 | 4.03 | 7.93  |                     |

|                       |      |      |      |      |      |      |      |      |      |
|-----------------------|------|------|------|------|------|------|------|------|------|
| <b>C<sup>20</sup></b> | 5.81 | 1.94 | 2.46 | 4.68 | 4.16 | 4.30 | n.a. | 7.42 | 5.34 |
| <b>T<sup>21</sup></b> | 5.55 | 2.09 | 2.39 | 4.84 | 4.11 | n.a. | n.a. | 7.40 | 1.66 |
| <b>A<sup>22</sup></b> | 6.01 | 2.72 | 2.86 | 5.03 | 4.38 | 4.02 | 4.12 | 8.20 |      |
| <b>G<sup>23</sup></b> | 5.80 | 2.47 | 2.62 | 4.93 | 4.34 | n.a. | n.a. | 7.68 |      |
| <b>C<sup>24</sup></b> | 6.11 | 2.12 | 2.20 | 4.45 | 4.03 | 4.45 | n.a. | 7.40 | 5.35 |

Assignments of the 5'-Cp-*N*<sup>2</sup>-dG-3'-*S*-( $\alpha$ )-CH<sub>3</sub>-Propyl-5'-Cp-*N*<sup>2</sup>-dG-3' Inter-strand Cross-link **8b**

Protons:

| <b>Proton</b>                                        | <b>Chemical Shift (ppm)</b> |
|------------------------------------------------------|-----------------------------|
| <b>X<sup>7</sup> H<sub><math>\alpha</math></sub></b> | 3.28                        |
| <b>CH<sub>3</sub></b>                                | 1.17                        |
| <b>H<sub><math>\beta</math>1</sub></b>               | 1.09                        |
| <b>H<sub><math>\beta</math>2</sub></b>               | 2.77                        |
| <b>H<sub><math>\gamma</math>1</sub></b>              | 4.06                        |
| <b>H<sub><math>\gamma</math>2</sub></b>              | 2.84                        |

**Table S3.**  $^1\text{H}$  Chemical Shifts (ppm) of Exchangeable Protons in the Oligodeoxynucleotide 5'-d(GCTAGCXAGTCC)-3'•5'-(GGACTCYCTAGC)-3' Containing the 5'-Cp- $N^2$ -dG-3'- $R$ -( $\alpha$ )- $\text{CH}_3$ -propyl-5'-Cp- $N^2$ -dG-3' Inter-strand Cross-link **8a**.

| Base-pair                            | Imino Protons<br>(G N1H/T N3H) | Cytosine Amino<br>Proton C NH <sub>4a</sub> | Cytosine Amino<br>Proton C NH <sub>4b</sub> |
|--------------------------------------|--------------------------------|---------------------------------------------|---------------------------------------------|
| <b>C<sup>2</sup>•G<sup>23</sup></b>  | 12.91                          | 8.39                                        | 6.73                                        |
| <b>T<sup>3</sup>•A<sup>22</sup></b>  | 13.88                          |                                             |                                             |
| <b>A<sup>4</sup>•T<sup>21</sup></b>  | 13.76                          |                                             |                                             |
| <b>G<sup>5</sup>•C<sup>20</sup></b>  | 12.73                          | 8.09                                        | 6.51                                        |
| <b>C<sup>6</sup>•Y<sup>19</sup></b>  | 12.61                          | 8.25                                        | 6.32                                        |
| <b>X<sup>7</sup>•C<sup>18</sup></b>  | 12.45                          | 8.58                                        | 6.82                                        |
| <b>A<sup>8</sup>•T<sup>17</sup></b>  | 13.86                          |                                             |                                             |
| <b>G<sup>9</sup>•C<sup>16</sup></b>  | 12.83                          | 7.96                                        | 6.71                                        |
| <b>T<sup>10</sup>•A<sup>15</sup></b> | 13.68                          |                                             |                                             |
| <b>C<sup>11</sup>•G<sup>14</sup></b> | 12.87                          | 8.48                                        | 6.97                                        |

**Table S4.**  $^1\text{H}$  Chemical Shifts (ppm) of Exchangeable Protons in the Oligodeoxynucleotide 5'-d(GCTAGCXAGTCC)-3'•5'-(GGACTCYCTAGC)-3' Containing the 5'-Cp- $N^2$ -dG-3'- $S$ -( $\alpha$ )- $\text{CH}_3$ -propyl-5'-Cp- $N^2$ -dG-3' Inter-strand Cross-link **8b**.

| Base-pair                            | Imino Protons<br>(G N1H/T N3H) | Cytosine Amino<br>Proton C NH <sub>4a</sub> | Cytosine Amino<br>Proton C NH <sub>4b</sub> |
|--------------------------------------|--------------------------------|---------------------------------------------|---------------------------------------------|
| <b>C<sup>2</sup>•G<sup>23</sup></b>  | 12.88                          | 8.35                                        | 6.69                                        |
| <b>T<sup>3</sup>•A<sup>22</sup></b>  | 13.86                          |                                             |                                             |
| <b>A<sup>4</sup>•T<sup>21</sup></b>  | 13.71                          |                                             |                                             |
| <b>G<sup>5</sup>•C<sup>20</sup></b>  | 12.72                          | 8.08                                        | 6.42                                        |
| <b>C<sup>6</sup>•Y<sup>19</sup></b>  | 12.52                          | 8.30                                        | 6.28                                        |
| <b>X<sup>7</sup>•C<sup>18</sup></b>  | 12.29                          | 8.39                                        | 6.73                                        |
| <b>A<sup>8</sup>•T<sup>17</sup></b>  | 13.87                          |                                             |                                             |
| <b>G<sup>9</sup>•C<sup>16</sup></b>  | 12.84                          | 7.94                                        | 6.70                                        |
| <b>T<sup>10</sup>•A<sup>15</sup></b> | 13.68                          |                                             |                                             |
| <b>C<sup>11</sup>•G<sup>14</sup></b> | 12.85                          | 8.44                                        | 6.93                                        |

**Table S5.** NOE Distance Restraints Used in rMD Calculations for the Oligodeoxynucleotide 5'-d(GCTAGCXAGTCC)-3'•5'-(GGACTCYCTAGC)-3' Containing the 5'-Cp-*N*<sup>2</sup>-dG-3'-*R*-( $\alpha$ )-CH<sub>3</sub>-propyl-5'-Cp-*N*<sup>2</sup>-dG-3' Inter-strand Cross-link **8a**.

## Class 1

| res_# | res_name | atm_name | res_# | res_name | atm_name | low_bnd | up_bnd |
|-------|----------|----------|-------|----------|----------|---------|--------|
| 1     | GUA      | H1'      | 1     | GUA      | H8       | 3.51    | 4.45   |
| 1     | GUA      | H2'2     | 1     | GUA      | H3'      | 2.61    | 3.35   |
| 1     | GUA      | H3'      | 1     | GUA      | H8       | 4.03    | 5.70   |
| 2     | CYT      | H5       | 1     | GUA      | H8       | 3.66    | 4.97   |
| 2     | CYT      | H2'1     | 2     | CYT      | H6       | 1.88    | 2.19   |
| 2     | CYT      | H2'2     | 2     | CYT      | H6       | 3.86    | 6.05   |
| 2     | CYT      | H4'      | 2     | CYT      | H2'1     | 3.76    | 5.32   |
| 2     | CYT      | H4'      | 2     | CYT      | H2'2     | 3.01    | 4.28   |
| 2     | CYT      | H5       | 2     | CYT      | H6       | 2.31    | 2.46   |
| 3     | THY      | M        | 2     | CYT      | H6       | 3.53    | 4.60   |
| 5     | GUA      | H3'      | 5     | GUA      | H1'      | 3.37    | 3.68   |
| 5     | GUA      | H8       | 5     | GUA      | H1'      | 3.33    | 3.98   |
| 5     | GUA      | H2'1     | 6     | CYT      | H6       | 3.62    | 5.46   |
| 6     | CYT      | H5       | 5     | GUA      | H2'2     | 2.73    | 2.92   |
| 6     | CYT      | H5       | 5     | GUA      | H8       | 3.51    | 3.90   |
| 6     | CYT      | H6       | 5     | GUA      | H1'      | 3.02    | 3.22   |
| 6     | CYT      | H6       | 5     | GUA      | H2'2     | 2.47    | 2.65   |
| 6     | CYT      | H1'      | 6     | CYT      | H2'1     | 2.76    | 3.88   |
| 6     | CYT      | H1'      | 6     | CYT      | H2'2     | 2.02    | 2.25   |
| 6     | CYT      | H1'      | 6     | CYT      | H3'      | 3.70    | 4.71   |
| 6     | CYT      | H1'      | 6     | CYT      | H6       | 3.17    | 3.81   |



|    |     |      |    |     |      |      |      |
|----|-----|------|----|-----|------|------|------|
| 6  | CYT | H2'1 | 6  | CYT | H3'  | 2.38 | 2.58 |
| 6  | CYT | H2'1 | 6  | CYT | H6   | 2.21 | 2.45 |
| 6  | CYT | H2'2 | 6  | CYT | H3'  | 2.61 | 3.20 |
| 6  | CYT | H2'2 | 6  | CYT | H6   | 2.95 | 4.39 |
| 6  | CYT | H3'  | 6  | CYT | H6   | 3.17 | 3.52 |
| 6  | CYT | H5   | 6  | CYT | H6   | 2.29 | 2.42 |
| 7  | X   | H2x1 | 7  | X   | H1x  | 2.16 | 2.98 |
| 7  | X   | H2x1 | 7  | X   | M    | 2.63 | 3.79 |
| 7  | X   | H2x2 | 7  | X   | H1x  | 2.30 | 3.05 |
| 7  | X   | H2x2 | 7  | X   | M    | 2.67 | 3.78 |
| 7  | X   | M    | 7  | X   | H1x  | 2.15 | 2.86 |
| 8  | ADE | H2   | 7  | X   | M    | 4.00 | 5.09 |
| 8  | ADE | H4'  | 7  | X   | M    | 4.11 | 5.57 |
| 8  | ADE | H8   | 7  | X   | H1'  | 2.88 | 3.16 |
| 8  | ADE | H2'1 | 8  | ADE | H8   | 2.10 | 2.42 |
| 8  | ADE | H2'2 | 8  | ADE | H8   | 3.30 | 4.85 |
| 8  | ADE | H8   | 8  | ADE | H1'  | 3.42 | 4.06 |
| 9  | GUA | H8   | 9  | GUA | H1'  | 3.38 | 4.00 |
| 10 | THY | H6   | 9  | GUA | H1'  | 2.67 | 3.43 |
| 10 | THY | M    | 9  | GUA | H1'  | 4.58 | 6.91 |
| 10 | THY | M    | 9  | GUA | H2'1 | 3.47 | 4.48 |
| 10 | THY | M    | 9  | GUA | H3'  | 4.20 | 5.42 |
| 10 | THY | M    | 9  | GUA | H8   | 3.53 | 4.48 |
| 10 | THY | H1'  | 10 | THY | H6   | 3.58 | 4.35 |
| 10 | THY | M    | 10 | THY | H6   | 2.81 | 3.54 |
| 10 | THY | H1'  | 11 | CYT | H6   | 3.41 | 4.38 |
| 11 | CYT | H5   | 10 | THY | H2'1 | 3.18 | 5.55 |

|    |     |      |    |     |      |      |      |
|----|-----|------|----|-----|------|------|------|
| 11 | CYT | H5   | 10 | THY | H6   | 3.29 | 3.59 |
| 11 | CYT | H2'1 | 11 | CYT | H5   | 4.05 | 5.89 |
| 11 | CYT | H5   | 11 | CYT | H6   | 2.25 | 2.38 |
| 11 | CYT | H1'  | 15 | ADE | H2   | 3.72 | 4.20 |
| 12 | CYT | H3'  | 12 | CYT | H1'  | 3.96 | 5.79 |
| 12 | CYT | H4'  | 12 | CYT | H1'  | 3.06 | 3.23 |
| 12 | CYT | H6   | 12 | CYT | H1'  | 3.47 | 4.61 |
| 13 | GUA | H1'  | 13 | GUA | H3'  | 3.82 | 5.06 |
| 13 | GUA | H3'  | 13 | GUA | H8   | 4.62 | 7.30 |
| 13 | GUA | H1'  | 14 | GUA | H8   | 3.43 | 3.91 |
| 14 | GUA | H1'  | 14 | GUA | H8   | 3.50 | 5.14 |
| 14 | GUA | H3'  | 14 | GUA | H8   | 3.81 | 5.59 |
| 15 | ADE | H8   | 14 | GUA | H8   | 4.54 | 6.59 |
| 15 | ADE | H2   | 15 | ADE | H1'  | 4.03 | 5.08 |
| 15 | ADE | H2'1 | 15 | ADE | H1'  | 2.95 | 3.45 |
| 15 | ADE | H2'2 | 15 | ADE | H1'  | 2.30 | 2.40 |
| 15 | ADE | H3'  | 15 | ADE | H1'  | 3.54 | 4.41 |
| 15 | ADE | H4'  | 15 | ADE | H1'  | 3.07 | 3.21 |
| 15 | ADE | H8   | 15 | ADE | H1'  | 3.47 | 4.31 |
| 16 | CYT | H1'  | 15 | ADE | H2   | 3.32 | 3.52 |
| 16 | CYT | H5   | 15 | ADE | H2'2 | 3.46 | 4.44 |
| 16 | CYT | H5   | 15 | ADE | H8   | 3.40 | 3.66 |
| 16 | CYT | H6   | 15 | ADE | H1'  | 3.15 | 3.38 |
| 16 | CYT | H6   | 15 | ADE | H2'1 | 3.18 | 3.85 |
| 16 | CYT | H6   | 15 | ADE | H2'2 | 2.00 | 2.66 |
| 16 | CYT | H6   | 15 | ADE | H8   | 3.73 | 5.10 |
| 16 | CYT | H2'1 | 16 | CYT | H6   | 1.82 | 2.47 |

|    |     |      |    |     |      |      |      |
|----|-----|------|----|-----|------|------|------|
| 16 | CYT | H3'  | 16 | CYT | H6   | 3.31 | 4.07 |
| 16 | CYT | H4'  | 16 | CYT | H2'1 | 3.76 | 4.81 |
| 16 | CYT | H5   | 16 | CYT | H6   | 2.36 | 2.48 |
| 16 | CYT | H6   | 16 | CYT | H1'  | 3.36 | 3.70 |
| 16 | CYT | H2'2 | 17 | THY | M    | 3.90 | 6.82 |
| 17 | THY | H6   | 16 | CYT | H1'  | 4.00 | 5.41 |
| 17 | THY | H6   | 16 | CYT | H3'  | 4.14 | 6.00 |
| 17 | THY | M    | 16 | CYT | H3'  | 3.69 | 4.67 |
| 17 | THY | M    | 16 | CYT | H5   | 4.06 | 5.13 |
| 17 | THY | M    | 16 | CYT | H6   | 3.49 | 4.44 |
| 17 | THY | H1'  | 17 | THY | H6   | 3.08 | 3.79 |
| 17 | THY | M    | 17 | THY | H6   | 2.83 | 3.57 |
| 17 | THY | H1'  | 18 | CYT | H6   | 3.79 | 4.87 |
| 18 | CYT | H5   | 17 | THY | H6   | 3.12 | 3.44 |
| 18 | CYT | H2'1 | 18 | CYT | H1'  | 2.92 | 6.26 |
| 18 | CYT | H2'2 | 18 | CYT | H1'  | 2.25 | 2.35 |
| 18 | CYT | H3'  | 18 | CYT | H6   | 3.54 | 4.48 |
| 19 | Y   | H3x1 | 7  | X   | H2x1 | 2.08 | 2.92 |
| 19 | Y   | H3x1 | 7  | X   | H2x2 | 2.06 | 2.81 |
| 19 | Y   | H3x1 | 7  | X   | M    | 3.29 | 6.38 |
| 19 | Y   | H3x2 | 7  | X   | H2x2 | 2.16 | 2.88 |
| 19 | Y   | H3x2 | 7  | X   | M    | 2.83 | 4.59 |
| 19 | Y   | H8   | 18 | CYT | H1'  | 3.72 | 4.85 |
| 19 | Y   | H8   | 18 | CYT | H2'2 | 3.01 | 3.43 |
| 19 | Y   | H1'  | 19 | Y   | H8   | 3.56 | 5.13 |
| 20 | CYT | H1'  | 19 | Y   | H3x2 | 2.26 | 2.62 |
| 20 | CYT | H5   | 19 | Y   | H8   | 3.53 | 4.52 |

|    |     |      |    |     |      |      |      |
|----|-----|------|----|-----|------|------|------|
| 20 | CYT | H6   | 19 | Y   | H2'1 | 3.12 | 3.93 |
| 21 | THY | H5'1 | 20 | CYT | H1'  | 3.39 | 5.13 |
| 22 | ADE | H8   | 21 | THY | H2'1 | 4.01 | 6.51 |
| 22 | ADE | H3'  | 23 | GUA | H8   | 3.81 | 5.02 |
| 23 | GUA | H1'  | 23 | GUA | H3'  | 3.58 | 4.16 |
| 24 | CYT | H1'  | 24 | CYT | H3'  | 3.65 | 4.57 |

Class

2

| res_# | res_name | atm_name | res_# | res_name | atm_name | low_bnd | up_bnd |
|-------|----------|----------|-------|----------|----------|---------|--------|
| 1     | GUA      | H2'1     | 1     | GUA      | H8       | 2.12    | 2.30   |
| 1     | GUA      | H2'2     | 1     | GUA      | H8       | 2.97    | 4.96   |
| 1     | GUA      | H4'      | 1     | GUA      | H2'1     | 2.94    | 3.96   |
| 2     | CYT      | H6       | 1     | GUA      | H2'2     | 2.40    | 2.60   |
| 2     | CYT      | H1'      | 2     | CYT      | H6       | 3.19    | 3.81   |
| 3     | THY      | M        | 2     | CYT      | H2'2     | 3.70    | 5.24   |
| 3     | THY      | H1'      | 3     | THY      | H6       | 3.14    | 3.79   |
| 3     | THY      | H2'1     | 4     | ADE      | H8       | 3.07    | 3.35   |
| 4     | ADE      | H4'      | 4     | ADE      | H2'1     | 3.24    | 4.01   |
| 4     | ADE      | H4'      | 4     | ADE      | H2'2     | 3.45    | 4.39   |
| 4     | ADE      | H1'      | 5     | GUA      | H8       | 2.76    | 3.33   |
| 4     | ADE      | H3'      | 5     | GUA      | H8       | 3.68    | 4.59   |
| 5     | GUA      | H8       | 4     | ADE      | H2'1     | 2.81    | 3.38   |
| 5     | GUA      | H8       | 4     | ADE      | H2'2     | 2.37    | 2.83   |
| 5     | GUA      | H2'2     | 5     | GUA      | H8       | 2.73    | 4.16   |
| 5     | GUA      | H4'      | 5     | GUA      | H1'      | 2.77    | 2.97   |
| 5     | GUA      | H2'1     | 6     | CYT      | H5       | 4.00    | 6.14   |
| 6     | CYT      | H5       | 5     | GUA      | H1'      | 3.61    | 4.61   |

|    |     |      |    |     |      |      |      |
|----|-----|------|----|-----|------|------|------|
| 6  | CYT | H2'2 | 6  | CYT | H2'1 | 1.80 | 2.10 |
| 7  | X   | H8   | 6  | CYT | H2'2 | 3.09 | 3.58 |
| 7  | X   | H3'  | 7  | X   | H1'  | 3.13 | 4.01 |
| 7  | X   | H3'  | 7  | X   | H8   | 3.43 | 4.71 |
| 8  | ADE | H3'  | 8  | ADE | H8   | 3.32 | 4.66 |
| 9  | GUA | H8   | 8  | ADE | H3'  | 4.43 | 5.72 |
| 9  | GUA | H8   | 8  | ADE | H8   | 3.79 | 5.70 |
| 9  | GUA | H2'1 | 9  | GUA | H8   | 2.24 | 2.40 |
| 9  | GUA | H3'  | 9  | GUA | H1'  | 3.51 | 4.31 |
| 9  | GUA | H2'2 | 10 | THY | H6   | 2.06 | 2.74 |
| 9  | GUA | H2'2 | 10 | THY | M    | 3.32 | 4.52 |
| 10 | THY | H6   | 9  | GUA | H2'1 | 2.75 | 3.49 |
| 10 | THY | H6   | 9  | GUA | H8   | 3.72 | 5.16 |
| 10 | THY | H2'1 | 10 | THY | H6   | 2.08 | 2.28 |
| 10 | THY | H2'2 | 10 | THY | H6   | 3.00 | 4.63 |
| 10 | THY | H3'  | 10 | THY | H6   | 3.17 | 4.28 |
| 11 | CYT | H5   | 10 | THY | H3'  | 3.65 | 5.42 |
| 11 | CYT | H5   | 10 | THY | M    | 4.33 | 5.84 |
| 11 | CYT | H6   | 10 | THY | H2'1 | 3.03 | 4.45 |
| 11 | CYT | H6   | 10 | THY | H6   | 3.67 | 5.67 |
| 11 | CYT | H1'  | 11 | CYT | H2'1 | 2.59 | 5.47 |
| 11 | CYT | H1'  | 11 | CYT | H2'2 | 2.04 | 2.19 |
| 11 | CYT | H2'1 | 11 | CYT | H6   | 2.00 | 2.17 |
| 11 | CYT | H4'  | 11 | CYT | H2'1 | 3.12 | 4.04 |
| 12 | CYT | H5   | 11 | CYT | H6   | 3.39 | 4.34 |
| 12 | CYT | H3'  | 12 | CYT | H6   | 2.77 | 3.09 |
| 12 | CYT | H4'  | 12 | CYT | H3'  | 2.47 | 2.92 |

|    |     |      |    |     |      |      |      |
|----|-----|------|----|-----|------|------|------|
| 13 | GUA | H1'  | 13 | GUA | H8   | 3.21 | 3.91 |
| 13 | GUA | H2'1 | 13 | GUA | H8   | 2.10 | 2.30 |
| 13 | GUA | H2'2 | 13 | GUA | H8   | 2.70 | 4.06 |
| 14 | GUA | H8   | 13 | GUA | H2'2 | 2.31 | 2.52 |
| 14 | GUA | H1'  | 14 | GUA | H3'  | 3.26 | 3.97 |
| 14 | GUA | H2'1 | 14 | GUA | H8   | 2.00 | 2.29 |
| 16 | CYT | H5   | 15 | ADE | H2'1 | 3.29 | 4.12 |
| 16 | CYT | H6   | 15 | ADE | H3'  | 3.84 | 5.01 |
| 17 | THY | H6   | 16 | CYT | H2'1 | 2.87 | 4.16 |
| 17 | THY | M    | 16 | CYT | H1'  | 4.90 | 7.90 |
| 17 | THY | M    | 16 | CYT | H2'1 | 3.02 | 3.93 |
| 17 | THY | H2'1 | 17 | THY | H6   | 1.94 | 2.09 |
| 18 | CYT | H1'  | 8  | ADE | H2   | 3.81 | 4.48 |
| 18 | CYT | H2'1 | 18 | CYT | H3'  | 2.43 | 2.85 |
| 18 | CYT | H2'1 | 18 | CYT | H5   | 3.70 | 5.24 |
| 18 | CYT | H2'1 | 18 | CYT | H6   | 2.10 | 2.24 |
| 18 | CYT | H2'2 | 18 | CYT | H3'  | 2.85 | 3.35 |
| 18 | CYT | H6   | 18 | CYT | H1'  | 3.19 | 3.96 |
| 19 | Y   | H3x1 | 7  | X   | H1x  | 2.16 | 2.42 |
| 19 | Y   | H3x2 | 7  | X   | H2x1 | 2.09 | 2.59 |
| 19 | Y   | H8   | 18 | CYT | H2'1 | 2.85 | 3.13 |
| 19 | Y   | H2'1 | 19 | Y   | H8   | 2.10 | 2.29 |
| 19 | Y   | H2'2 | 19 | Y   | H8   | 2.50 | 3.54 |
| 19 | Y   | H3'  | 19 | Y   | H8   | 3.53 | 4.95 |
| 20 | CYT | H6   | 19 | Y   | H2'2 | 2.05 | 2.82 |
| 20 | CYT | H5   | 20 | CYT | H6   | 2.26 | 2.42 |
| 20 | CYT | H2'2 | 21 | THY | M    | 3.69 | 6.24 |

|    |     |      |    |     |      |      |      |
|----|-----|------|----|-----|------|------|------|
| 21 | THY | M    | 20 | CYT | H2'1 | 3.07 | 4.04 |
| 21 | THY | M    | 20 | CYT | H3'  | 3.79 | 4.90 |
| 21 | THY | H1'  | 21 | THY | H6   | 3.16 | 4.65 |
| 22 | ADE | H1'  | 23 | GUA | H8   | 3.04 | 3.34 |
| 22 | ADE | H2'1 | 23 | GUA | H8   | 2.77 | 3.20 |
| 22 | ADE | H2'2 | 23 | GUA | H8   | 2.27 | 2.83 |
| 23 | GUA | H2'2 | 23 | GUA | H8   | 2.79 | 4.05 |
| 24 | CYT | H1'  | 24 | CYT | H2'1 | 2.87 | 4.32 |
| 24 | CYT | H1'  | 24 | CYT | H2'2 | 2.12 | 2.29 |
| 24 | CYT | H2'1 | 24 | CYT | H3'  | 2.42 | 2.64 |
| 24 | CYT | H3'  | 24 | CYT | H6   | 2.94 | 3.29 |
| 24 | CYT | H5   | 24 | CYT | H6   | 2.43 | 2.57 |

Class

3

| res_# | res_name | atm_name | res_# | res_name | atm_name | low_bnd | up_bnd |
|-------|----------|----------|-------|----------|----------|---------|--------|
| 1     | GUA      | H4'      | 1     | GUA      | H2'2     | 3.21    | 4.12   |
| 2     | CYT      | H6       | 1     | GUA      | H8       | 3.56    | 5.01   |
| 2     | CYT      | H2'1     | 2     | CYT      | H5       | 3.66    | 5.24   |
| 5     | GUA      | H3'      | 5     | GUA      | H8       | 3.33    | 5.03   |
| 6     | CYT      | H6       | 5     | GUA      | H3'      | 3.70    | 4.75   |
| 7     | X        | H5'1     | 6     | CYT      | H2'2     | 2.89    | 3.50   |
| 7     | X        | H8       | 6     | CYT      | H2'1     | 2.97    | 3.56   |
| 7     | X        | H1x      | 7     | X        | H1'      | 3.29    | 4.55   |
| 8     | ADE      | H1'      | 7     | X        | H1x      | 3.33    | 4.96   |
| 8     | ADE      | H1'      | 7     | X        | M        | 2.94    | 4.35   |
| 9     | GUA      | H1'      | 8     | ADE      | H2       | 3.54    | 3.93   |
| 10    | THY      | H6       | 9     | GUA      | H3'      | 3.34    | 4.99   |

|    |     |      |    |     |      |      |      |
|----|-----|------|----|-----|------|------|------|
| 10 | THY | H2'1 | 10 | THY | M    | 4.49 | 7.47 |
| 11 | CYT | H1'  | 11 | CYT | H6   | 3.30 | 3.81 |
| 11 | CYT | H1'  | 12 | CYT | H6   | 3.70 | 5.93 |
| 14 | GUA | H8   | 13 | GUA | H2'1 | 2.88 | 4.21 |
| 14 | GUA | H8   | 13 | GUA | H3'  | 3.52 | 4.70 |
| 15 | ADE | H4'  | 15 | ADE | H2'1 | 3.29 | 4.66 |
| 15 | ADE | H4'  | 15 | ADE | H2'2 | 3.47 | 4.71 |
| 15 | ADE | H4'  | 15 | ADE | H8   | 4.05 | 5.75 |
| 16 | CYT | H1'  | 15 | ADE | H1'  | 3.37 | 4.70 |
| 16 | CYT | H5   | 15 | ADE | H1'  | 3.82 | 4.79 |
| 17 | THY | H2'1 | 17 | THY | M    | 4.31 | 7.30 |
| 17 | THY | H3'  | 18 | CYT | H6   | 4.00 | 5.82 |
| 18 | CYT | H5   | 17 | THY | M    | 4.82 | 7.75 |
| 19 | Y   | H3x2 | 19 | Y   | H3x1 | 1.65 | 1.88 |
| 20 | CYT | H6   | 19 | Y   | H8   | 3.50 | 4.98 |
| 21 | THY | H6   | 20 | CYT | H2'1 | 2.42 | 3.80 |
| 21 | THY | H2'1 | 21 | THY | H6   | 1.82 | 2.05 |
| 23 | GUA | H3'  | 23 | GUA | H8   | 3.29 | 5.05 |
| 24 | CYT | H1'  | 24 | CYT | H6   | 3.46 | 4.77 |

Class

4

| res_# | res_name | atm_name | res_# | res_name | atm_name | low_bnd | up_bnd |
|-------|----------|----------|-------|----------|----------|---------|--------|
| 4     | ADE      | H8       | 3     | THY      | H3'      | 3.98    | 5.93   |
| 6     | CYT      | H4'      | 6     | CYT      | H2'2     | 2.66    | 3.02   |
| 7     | X        | H1'      | 7     | X        | M        | 4.04    | 5.62   |
| 7     | X        | H2x2     | 7     | X        | H2x1     | 1.65    | 1.84   |
| 7     | X        | H3'      | 8     | ADE      | H8       | 3.89    | 5.53   |



|    |     |      |    |     |      |      |      |
|----|-----|------|----|-----|------|------|------|
| 11 | CYT | H3'  | 12 | CYT | H6   | 3.50 | 4.73 |
| 12 | CYT | H6   | 11 | CYT | H2'1 | 3.04 | 5.53 |
| 16 | CYT | H2'1 | 16 | CYT | H5   | 3.92 | 5.32 |
| 18 | CYT | H4'  | 18 | CYT | H2'1 | 3.73 | 5.91 |
| 19 | Y   | H8   | 18 | CYT | H6   | 3.79 | 5.26 |
| 20 | CYT | H1'  | 7  | X   | M    | 5.19 | 8.54 |
| 20 | CYT | H6   | 19 | Y   | H3'  | 3.83 | 5.32 |
| 20 | CYT | H2'1 | 20 | CYT | H5   | 4.22 | 6.60 |
| 21 | THY | H3'  | 22 | ADE | H8   | 3.54 | 5.01 |
| 24 | CYT | H5   | 23 | GUA | H8   | 3.46 | 4.24 |
| 24 | CYT | H6   | 23 | GUA | H3'  | 3.92 | 5.93 |

Class

5

| res_# | res_name | atm_name | res_# | res_name | atm_name | low_bnd | up_bnd |
|-------|----------|----------|-------|----------|----------|---------|--------|
| 2     | CYT      | H3'      | 3     | THY      | H6       | 3.47    | 4.83   |
| 3     | THY      | H3'      | 3     | THY      | H6       | 2.86    | 4.21   |
| 6     | CYT      | H2'1     | 6     | CYT      | H5       | 4.30    | 5.68   |
| 20    | CYT      | H1'      | 7     | X        | H1x      | 3.54    | 5.07   |
| 20    | CYT      | H4'      | 7     | X        | M        | 4.91    | 8.03   |
| 20    | CYT      | H3'      | 20    | CYT      | H6       | 2.94    | 4.28   |
| 21    | THY      | H6       | 20    | CYT      | H3'      | 3.07    | 4.38   |

**Table S6.** NOE Distance Restraints Used in rMD Calculations for the Oligodeoxynucleotide 5'-d(GCTAGCXAGTCC)-3'•5'-(GGACTCYCTAGC)-3' Containing the 5'-Cp-*N*<sup>2</sup>-dG-3'-*S*-( $\alpha$ )-CH<sub>3</sub>-propyl-5'-Cp-*N*<sup>2</sup>-dG-3' Inter-strand Cross-link **8b**.

Class 1

| res_# | res_name | atm_name | res_# | res_name | atm_name | low_bnd | up_bnd |
|-------|----------|----------|-------|----------|----------|---------|--------|
| 1     | GUA      | H1'      | 1     | GUA      | H4'      | 3.11    | 3.38   |
| 1     | GUA      | H2'1     | 1     | GUA      | H8       | 2.02    | 2.44   |
| 1     | GUA      | H2'2     | 1     | GUA      | H8       | 3.03    | 3.77   |
| 1     | GUA      | H3'      | 1     | GUA      | H8       | 3.38    | 4.52   |
| 1     | GUA      | H8       | 1     | GUA      | H1'      | 3.20    | 4.08   |
| 2     | CYT      | H5       | 1     | GUA      | H8       | 3.49    | 4.01   |
| 2     | CYT      | H5       | 1     | GUA      | H2'2     | 3.10    | 3.38   |
| 2     | CYT      | H6       | 1     | GUA      | H1'      | 2.93    | 3.17   |
| 2     | CYT      | H6       | 1     | GUA      | H2'2     | 2.60    | 2.75   |
| 2     | CYT      | H1'      | 2     | CYT      | H4'      | 2.90    | 3.09   |
| 2     | CYT      | H2'2     | 2     | CYT      | H6       | 3.05    | 3.86   |
| 2     | CYT      | H5       | 2     | CYT      | H6       | 2.36    | 2.47   |
| 3     | THY      | H6       | 2     | CYT      | H1'      | 3.50    | 4.06   |
| 3     | THY      | M        | 2     | CYT      | H6       | 3.51    | 3.67   |
| 3     | THY      | M        | 2     | CYT      | H5       | 4.10    | 4.43   |
| 5     | GUA      | H8       | 4     | ADE      | H1'      | 3.19    | 3.48   |
| 5     | GUA      | H8       | 4     | ADE      | H2'2     | 2.23    | 2.93   |
| 5     | GUA      | H1'      | 5     | GUA      | H4'      | 2.99    | 3.19   |
| 5     | GUA      | H2'1     | 5     | GUA      | H8       | 2.33    | 2.45   |
| 5     | GUA      | H2'2     | 5     | GUA      | H1'      | 2.38    | 2.53   |
| 5     | GUA      | H2'2     | 5     | GUA      | H8       | 3.12    | 3.73   |
| 5     | GUA      | H3'      | 5     | GUA      | H8       | 3.72    | 4.86   |

|   |     |      |   |     |      |      |      |
|---|-----|------|---|-----|------|------|------|
| 5 | GUA | H8   | 5 | GUA | H1'  | 3.40 | 3.93 |
| 6 | CYT | H5   | 5 | GUA | H8   | 3.44 | 3.90 |
| 6 | CYT | H6   | 5 | GUA | H1'  | 3.03 | 3.26 |
| 6 | CYT | H6   | 5 | GUA | H2'2 | 2.45 | 2.93 |
| 6 | CYT | H1'  | 6 | CYT | H4'  | 2.74 | 2.94 |
| 6 | CYT | H2'1 | 6 | CYT | H1'  | 2.88 | 3.06 |
| 6 | CYT | H2'1 | 6 | CYT | H6   | 2.53 | 2.65 |
| 6 | CYT | H2'1 | 6 | CYT | H3'  | 2.03 | 2.64 |
| 6 | CYT | H2'2 | 6 | CYT | H4'  | 3.09 | 3.37 |
| 6 | CYT | H2'2 | 6 | CYT | H1'  | 2.30 | 2.41 |
| 6 | CYT | H2'2 | 6 | CYT | H2'1 | 1.80 | 2.19 |
| 6 | CYT | H3'  | 6 | CYT | H6   | 3.11 | 3.40 |
| 6 | CYT | H5   | 6 | CYT | H6   | 2.41 | 2.51 |
| 7 | X   | H3'  | 7 | X   | H5'1 | 2.93 | 3.85 |
| 7 | X   | H4'  | 7 | X   | H5'1 | 2.42 | 2.55 |
| 8 | ADE | H1'  | 7 | X   | M    | 3.13 | 3.28 |
| 8 | ADE | H8   | 7 | X   | H1'  | 3.05 | 3.29 |
| 8 | ADE | H1'  | 8 | ADE | H4'  | 2.71 | 2.86 |
| 8 | ADE | H2'1 | 8 | ADE | H8   | 2.46 | 2.58 |
| 8 | ADE | H2'1 | 8 | ADE | H3'  | 2.11 | 2.54 |
| 8 | ADE | H2'2 | 8 | ADE | H1'  | 2.39 | 2.52 |
| 8 | ADE | H2'2 | 8 | ADE | H2'1 | 1.81 | 2.08 |
| 9 | GUA | H8   | 8 | ADE | H2'1 | 2.90 | 3.10 |
| 9 | GUA | H8   | 8 | ADE | H2'2 | 2.15 | 2.81 |
| 9 | GUA | H2'1 | 9 | GUA | H8   | 2.51 | 2.65 |
| 9 | GUA | H2'2 | 9 | GUA | H2'1 | 1.80 | 2.08 |
| 9 | GUA | H8   | 9 | GUA | H1'  | 3.27 | 4.03 |

|    |     |      |    |     |      |      |      |
|----|-----|------|----|-----|------|------|------|
| 10 | THY | H6   | 9  | GUA | H1'  | 3.24 | 3.81 |
| 10 | THY | H6   | 9  | GUA | H2'1 | 2.94 | 3.42 |
| 10 | THY | H6   | 9  | GUA | H2'2 | 2.30 | 2.88 |
| 10 | THY | M    | 9  | GUA | H8   | 3.65 | 3.87 |
| 10 | THY | M    | 9  | GUA | H2'2 | 3.66 | 3.95 |
| 10 | THY | H2'1 | 10 | THY | H6   | 2.24 | 2.36 |
| 10 | THY | H2'2 | 10 | THY | H6   | 3.10 | 3.81 |
| 10 | THY | H6   | 10 | THY | H1'  | 3.32 | 3.71 |
| 10 | THY | M    | 10 | THY | H6   | 2.67 | 3.71 |
| 11 | CYT | H5   | 10 | THY | H6   | 3.37 | 3.81 |
| 11 | CYT | H6   | 10 | THY | H2'1 | 3.15 | 3.83 |
| 11 | CYT | H1'  | 11 | CYT | H4'  | 2.80 | 3.00 |
| 11 | CYT | H2'1 | 11 | CYT | H1'  | 2.95 | 3.15 |
| 11 | CYT | H2'1 | 11 | CYT | H6   | 2.25 | 2.37 |
| 11 | CYT | H2'1 | 11 | CYT | H3'  | 2.20 | 2.64 |
| 11 | CYT | H5   | 11 | CYT | H6   | 2.42 | 2.55 |
| 12 | CYT | H6   | 11 | CYT | H2'2 | 2.31 | 3.02 |
| 12 | CYT | H1'  | 12 | CYT | H4'  | 2.65 | 3.19 |
| 12 | CYT | H3'  | 12 | CYT | H5'2 | 2.98 | 3.23 |
| 12 | CYT | H3'  | 12 | CYT | H6   | 2.83 | 2.99 |
| 12 | CYT | H6   | 12 | CYT | H1'  | 3.31 | 3.72 |
| 13 | GUA | H2'1 | 13 | GUA | H8   | 2.36 | 2.49 |
| 13 | GUA | H2'2 | 13 | GUA | H8   | 3.23 | 3.98 |
| 13 | GUA | H2'2 | 13 | GUA | H3'  | 2.57 | 3.07 |
| 13 | GUA | H8   | 13 | GUA | H1'  | 3.35 | 4.32 |
| 14 | GUA | H8   | 13 | GUA | H2'1 | 3.16 | 3.55 |
| 14 | GUA | H8   | 13 | GUA | H2'2 | 2.57 | 3.05 |

|    |     |      |    |     |      |      |      |
|----|-----|------|----|-----|------|------|------|
| 14 | GUA | H1'  | 14 | GUA | H4'  | 3.03 | 3.25 |
| 14 | GUA | H8   | 14 | GUA | H1'  | 3.33 | 4.00 |
| 15 | ADE | H3'  | 15 | ADE | H5'2 | 2.57 | 2.75 |
| 15 | ADE | H3'  | 15 | ADE | H4'  | 2.62 | 2.76 |
| 15 | ADE | H4'  | 15 | ADE | H5'1 | 2.52 | 2.65 |
| 15 | ADE | H4'  | 15 | ADE | H5'2 | 2.42 | 2.55 |
| 15 | ADE | H8   | 15 | ADE | H1'  | 3.45 | 4.02 |
| 16 | CYT | H5   | 15 | ADE | H8   | 3.39 | 3.88 |
| 16 | CYT | H6   | 15 | ADE | H1'  | 3.00 | 3.27 |
| 16 | CYT | H6   | 15 | ADE | H2'2 | 2.59 | 2.68 |
| 16 | CYT | H2'1 | 16 | CYT | H6   | 2.52 | 2.67 |
| 16 | CYT | H2'1 | 16 | CYT | H3'  | 2.01 | 2.63 |
| 16 | CYT | H3'  | 16 | CYT | H5'1 | 3.25 | 3.65 |
| 16 | CYT | H3'  | 16 | CYT | H5'2 | 2.84 | 2.99 |
| 16 | CYT | H3'  | 16 | CYT | H6   | 3.18 | 3.44 |
| 16 | CYT | H5   | 16 | CYT | H6   | 2.44 | 2.54 |
| 16 | CYT | H6   | 16 | CYT | H1'  | 3.26 | 3.90 |
| 17 | THY | H6   | 16 | CYT | H2'1 | 2.85 | 3.09 |
| 17 | THY | M    | 16 | CYT | H6   | 3.56 | 3.78 |
| 17 | THY | M    | 16 | CYT | H5   | 4.09 | 4.38 |
| 17 | THY | M    | 16 | CYT | H3'  | 3.67 | 3.95 |
| 17 | THY | M    | 16 | CYT | H2'1 | 3.16 | 4.08 |
| 17 | THY | M    | 17 | THY | H6   | 2.69 | 3.75 |
| 18 | CYT | H5   | 17 | THY | H6   | 3.25 | 3.51 |
| 18 | CYT | H2'1 | 18 | CYT | H1'  | 2.72 | 3.52 |
| 18 | CYT | H2'1 | 18 | CYT | H6   | 2.09 | 2.52 |
| 18 | CYT | H2'2 | 18 | CYT | H1'  | 2.39 | 2.52 |

|    |     |      |    |     |      |      |      |
|----|-----|------|----|-----|------|------|------|
| 18 | CYT | H2'2 | 18 | CYT | H2'1 | 1.80 | 2.22 |
| 18 | CYT | H3'  | 18 | CYT | H6   | 3.10 | 3.55 |
| 18 | CYT | H5   | 18 | CYT | H6   | 2.47 | 2.56 |
| 19 | Y   | H8   | 18 | CYT | H2'1 | 2.83 | 3.00 |
| 19 | Y   | H8   | 18 | CYT | H2'2 | 2.84 | 3.03 |
| 19 | Y   | H1'  | 19 | Y   | H4'  | 3.09 | 3.33 |
| 19 | Y   | H2'2 | 19 | Y   | H3'  | 2.70 | 2.91 |
| 19 | Y   | H3'  | 19 | Y   | H4'  | 2.65 | 2.79 |
| 19 | Y   | H8   | 19 | Y   | H2'2 | 2.89 | 3.15 |
| 19 | Y   | H8   | 19 | Y   | H2'1 | 2.28 | 2.40 |
| 20 | CYT | H5   | 19 | Y   | H8   | 3.44 | 3.94 |
| 20 | CYT | H6   | 19 | Y   | H1'  | 2.67 | 2.84 |
| 20 | CYT | H1'  | 20 | CYT | H4'  | 2.88 | 3.06 |
| 20 | CYT | H2'1 | 20 | CYT | H3'  | 1.97 | 2.63 |
| 21 | THY | M    | 20 | CYT | H5   | 4.09 | 4.47 |
| 21 | THY | M    | 20 | CYT | H2'1 | 2.89 | 3.42 |
| 23 | GUA | H8   | 22 | ADE | H1'  | 2.84 | 3.36 |
| 23 | GUA | H8   | 22 | ADE | H2'1 | 3.09 | 3.36 |
| 23 | GUA | H8   | 22 | ADE | H2'2 | 2.21 | 2.85 |
| 23 | GUA | H2'1 | 23 | GUA | H8   | 2.09 | 2.42 |
| 23 | GUA | H2'2 | 23 | GUA | H8   | 3.08 | 3.71 |
| 23 | GUA | H3'  | 23 | GUA | H8   | 3.45 | 4.32 |
| 24 | CYT | H5   | 23 | GUA | H8   | 3.34 | 3.79 |
| 24 | CYT | H1'  | 24 | CYT | H4'  | 2.88 | 3.08 |
| 24 | CYT | H3'  | 24 | CYT | H6   | 3.00 | 3.31 |

Class2

| res_# | res_name | atm_name | res_# | res_name | atm_name | low_bnd | up_bnd |
|-------|----------|----------|-------|----------|----------|---------|--------|
|-------|----------|----------|-------|----------|----------|---------|--------|

|    |     |      |    |     |      |      |      |
|----|-----|------|----|-----|------|------|------|
| 2  | CYT | H2'1 | 2  | CYT | H6   | 2.21 | 2.37 |
| 2  | CYT | H6   | 2  | CYT | H1'  | 3.42 | 4.26 |
| 3  | THY | M    | 2  | CYT | H3'  | 4.02 | 4.51 |
| 3  | THY | M    | 2  | CYT | H2'1 | 2.98 | 3.26 |
| 3  | THY | M    | 2  | CYT | H2'2 | 3.66 | 4.17 |
| 3  | THY | H2'2 | 3  | THY | H2'1 | 1.80 | 2.12 |
| 3  | THY | H3'  | 3  | THY | H6   | 3.19 | 4.15 |
| 5  | GUA | H8   | 4  | ADE | H2'1 | 3.10 | 3.59 |
| 6  | CYT | H5   | 5  | GUA | H2'2 | 3.10 | 3.55 |
| 6  | CYT | H3'  | 6  | CYT | H4'  | 2.76 | 2.97 |
| 7  | X   | H2x1 | 7  | X   | H1x  | 2.59 | 2.84 |
| 7  | X   | H2x1 | 7  | X   | M    | 2.63 | 2.89 |
| 7  | X   | H2x1 | 7  | X   | H2x2 | 1.80 | 2.11 |
| 7  | X   | H2x2 | 7  | X   | M    | 2.76 | 3.05 |
| 7  | X   | H4'  | 7  | X   | H5'2 | 2.37 | 2.59 |
| 7  | X   | M    | 7  | X   | H1'  | 3.98 | 4.44 |
| 7  | X   | M    | 7  | X   | H1x  | 2.21 | 2.48 |
| 8  | ADE | H4'  | 7  | X   | M    | 3.28 | 3.66 |
| 8  | ADE | H8   | 7  | X   | H2'2 | 2.62 | 2.86 |
| 8  | ADE | H2'2 | 8  | ADE | H8   | 3.11 | 4.07 |
| 9  | GUA | H2'1 | 9  | GUA | H1'  | 2.85 | 3.20 |
| 10 | THY | M    | 9  | GUA | H3'  | 4.18 | 4.86 |
| 10 | THY | M    | 9  | GUA | H2'1 | 3.06 | 4.38 |
| 11 | CYT | H6   | 10 | THY | H1'  | 3.36 | 4.20 |
| 11 | CYT | H2'2 | 11 | CYT | H2'1 | 1.80 | 2.19 |
| 12 | CYT | H6   | 11 | CYT | H1'  | 3.27 | 3.86 |
| 12 | CYT | H6   | 11 | CYT | H2'1 | 2.84 | 3.16 |

|    |     |      |    |     |      |      |      |
|----|-----|------|----|-----|------|------|------|
| 12 | CYT | H3'  | 12 | CYT | H4'  | 2.48 | 3.17 |
| 12 | CYT | H5   | 12 | CYT | H6   | 2.42 | 2.64 |
| 13 | GUA | H1'  | 13 | GUA | H4'  | 3.28 | 3.73 |
| 13 | GUA | H2'1 | 13 | GUA | H3'  | 2.44 | 2.69 |
| 13 | GUA | H2'2 | 13 | GUA | H1'  | 2.41 | 2.61 |
| 14 | GUA | H4'  | 14 | GUA | H5'1 | 2.39 | 2.63 |
| 14 | GUA | H4'  | 14 | GUA | H5'2 | 2.33 | 2.52 |
| 15 | ADE | H1'  | 15 | ADE | H4'  | 3.08 | 3.42 |
| 15 | ADE | H2'2 | 15 | ADE | H1'  | 2.36 | 2.58 |
| 15 | ADE | H3'  | 15 | ADE | H5'1 | 2.96 | 3.91 |
| 15 | ADE | H3'  | 15 | ADE | H1'  | 3.38 | 4.19 |
| 16 | CYT | H6   | 15 | ADE | H2'1 | 3.20 | 3.86 |
| 16 | CYT | H2'2 | 16 | CYT | H3'  | 3.01 | 3.30 |
| 16 | CYT | H2'2 | 16 | CYT | H2'1 | 1.80 | 2.18 |
| 16 | CYT | H3'  | 16 | CYT | H4'  | 2.49 | 2.95 |
| 17 | THY | M    | 16 | CYT | H2'2 | 3.74 | 4.21 |
| 17 | THY | H3'  | 17 | THY | H6   | 3.23 | 4.25 |
| 17 | THY | H6   | 17 | THY | H1'  | 3.09 | 3.76 |
| 19 | Y   | H3x1 | 7  | X   | H1x  | 2.37 | 2.59 |
| 19 | Y   | H3x1 | 7  | X   | H2x1 | 2.38 | 2.88 |
| 19 | Y   | H3x2 | 7  | X   | H2x1 | 2.32 | 2.57 |
| 19 | Y   | H1'  | 19 | Y   | H2'2 | 2.44 | 2.62 |
| 19 | Y   | H3x1 | 19 | Y   | H3x2 | 1.80 | 2.05 |
| 19 | Y   | H8   | 19 | Y   | H3'  | 3.46 | 4.63 |
| 20 | CYT | H6   | 19 | Y   | H2'2 | 2.61 | 2.86 |
| 20 | CYT | H2'1 | 20 | CYT | H1'  | 2.69 | 2.95 |
| 20 | CYT | H2'2 | 20 | CYT | H2'1 | 1.80 | 2.16 |



|    |     |      |    |     |      |      |      |
|----|-----|------|----|-----|------|------|------|
| 20 | CYT | H5   | 20 | CYT | H6   | 2.30 | 2.49 |
| 21 | THY | M    | 20 | CYT | H3'  | 3.67 | 4.12 |
| 21 | THY | H2'2 | 21 | THY | H6   | 2.95 | 3.56 |
| 23 | GUA | H2'2 | 23 | GUA | H1'  | 2.30 | 2.49 |
| 23 | GUA | H8   | 23 | GUA | H1'  | 3.23 | 3.96 |
| 24 | CYT | H6   | 23 | GUA | H2'2 | 2.28 | 2.81 |
| 24 | CYT | H2'2 | 24 | CYT | H1'  | 2.21 | 2.40 |
| 24 | CYT | H2'2 | 24 | CYT | H3'  | 2.97 | 3.53 |
| 24 | CYT | H5   | 24 | CYT | H6   | 2.41 | 2.59 |
| 24 | CYT | H6   | 24 | CYT | H1'  | 3.30 | 3.81 |

## Class3

| res_# | res_name | atm_name | res_# | res_name | atm_name | low_bnd | up_bnd |
|-------|----------|----------|-------|----------|----------|---------|--------|
| 2     | CYT      | H5       | 1     | GUA      | H2'1     | 3.46    | 5.15   |
| 2     | CYT      | H6       | 1     | GUA      | H2'1     | 3.14    | 4.04   |
| 3     | THY      | H2'2     | 3     | THY      | H4'      | 3.19    | 4.28   |
| 3     | THY      | M        | 3     | THY      | H6       | 2.66    | 2.99   |
| 5     | GUA      | H3'      | 5     | GUA      | H1'      | 3.38    | 4.39   |
| 6     | CYT      | H5'1     | 5     | GUA      | H1'      | 3.02    | 3.53   |
| 6     | CYT      | H3'      | 6     | CYT      | H5'2     | 2.68    | 3.03   |
| 7     | X        | H8       | 6     | CYT      | H2'1     | 2.91    | 3.42   |
| 7     | X        | H8       | 6     | CYT      | H2'2     | 3.13    | 3.55   |
| 7     | X        | H1'      | 7     | X        | H2'2     | 2.22    | 2.53   |
| 7     | X        | H1'      | 7     | X        | H2'1     | 2.75    | 3.35   |
| 8     | ADE      | H2'1     | 8     | ADE      | H1'      | 2.73    | 3.13   |
| 8     | ADE      | H3'      | 8     | ADE      | H8       | 3.43    | 4.37   |
| 9     | GUA      | H8       | 8     | ADE      | H1'      | 2.64    | 3.65   |
| 9     | GUA      | H2'2     | 9     | GUA      | H4'      | 3.29    | 4.04   |

|    |     |      |    |     |      |      |      |
|----|-----|------|----|-----|------|------|------|
| 9  | GUA | H2'2 | 9  | GUA | H1'  | 2.21 | 2.45 |
| 9  | GUA | H2'2 | 9  | GUA | H8   | 3.31 | 4.26 |
| 9  | GUA | H3'  | 9  | GUA | H8   | 3.29 | 4.46 |
| 10 | THY | H2'2 | 11 | CYT | H5   | 3.24 | 4.46 |
| 11 | CYT | H5   | 10 | THY | H2'1 | 3.19 | 4.42 |
| 11 | CYT | H6   | 11 | CYT | H1'  | 3.20 | 3.76 |
| 14 | GUA | H2'1 | 14 | GUA | H8   | 2.07 | 2.33 |
| 14 | GUA | H3'  | 14 | GUA | H1'  | 3.39 | 4.13 |
| 18 | CYT | H2'2 | 18 | CYT | H6   | 2.98 | 3.98 |
| 19 | Y   | H3x2 | 7  | X   | H1x  | 2.62 | 3.73 |
| 19 | Y   | H3x2 | 7  | X   | M    | 3.37 | 4.07 |
| 19 | Y   | H1'  | 19 | Y   | H3'  | 3.37 | 4.21 |
| 19 | Y   | H1'  | 19 | Y   | H2'1 | 2.92 | 3.56 |
| 19 | Y   | H8   | 19 | Y   | H1'  | 3.45 | 4.40 |
| 20 | CYT | H5   | 19 | Y   | H2'2 | 2.41 | 3.14 |
| 20 | CYT | H5   | 19 | Y   | H1'  | 3.06 | 3.59 |
| 20 | CYT | H3'  | 20 | CYT | H6   | 3.06 | 4.06 |
| 21 | THY | M    | 20 | CYT | H2'2 | 3.82 | 4.72 |
| 21 | THY | H2'2 | 21 | THY | H4'  | 3.15 | 4.13 |
| 21 | THY | H3'  | 21 | THY | H6   | 3.14 | 4.21 |

## Class4

| res_# | res_name | atm_name | res_# | res_name | atm_name | low_bnd | up_bnd |
|-------|----------|----------|-------|----------|----------|---------|--------|
| 2     | CYT      | H5       | 1     | GUA      | H1'      | 3.38    | 4.38   |
| 2     | CYT      | H2'1     | 2     | CYT      | H4'      | 3.16    | 4.52   |
| 2     | CYT      | H2'2     | 2     | CYT      | H4'      | 3.08    | 3.80   |
| 3     | THY      | H2'1     | 3     | THY      | H4'      | 2.88    | 3.90   |
| 3     | THY      | H2'2     | 3     | THY      | H3'      | 2.50    | 2.99   |

|    |     |      |    |     |      |      |      |
|----|-----|------|----|-----|------|------|------|
| 4  | ADE | H8   | 3  | THY | H2'1 | 3.53 | 6.96 |
| 6  | CYT | H5   | 5  | GUA | H1'  | 3.37 | 4.48 |
| 6  | CYT | H2'2 | 6  | CYT | H6   | 3.23 | 4.05 |
| 6  | CYT | H2'2 | 6  | CYT | H3'  | 2.79 | 3.29 |
| 6  | CYT | H3'  | 6  | CYT | H5'1 | 3.12 | 3.94 |
| 6  | CYT | H6   | 6  | CYT | H1'  | 3.28 | 4.36 |
| 7  | X   | H2x2 | 7  | X   | H1x  | 2.71 | 3.21 |
| 7  | X   | H8   | 7  | X   | H3'  | 3.23 | 4.53 |
| 8  | ADE | H2   | 7  | X   | M    | 4.41 | 6.86 |
| 8  | ADE | H3'  | 8  | ADE | H1'  | 3.35 | 4.76 |
| 11 | CYT | H5   | 10 | THY | M    | 4.55 | 7.46 |
| 11 | CYT | H2'2 | 11 | CYT | H1'  | 2.18 | 2.54 |
| 12 | CYT | H5   | 11 | CYT | H6   | 3.35 | 4.55 |
| 13 | GUA | H3'  | 13 | GUA | H8   | 3.58 | 5.68 |
| 14 | GUA | H2'2 | 14 | GUA | H8   | 2.59 | 3.47 |
| 14 | GUA | H3'  | 14 | GUA | H8   | 3.31 | 4.63 |
| 16 | CYT | H5   | 15 | ADE | H2'2 | 3.11 | 4.03 |
| 16 | CYT | H6   | 15 | ADE | H8   | 3.56 | 5.94 |
| 17 | THY | H2'2 | 17 | THY | H3'  | 2.53 | 3.15 |
| 17 | THY | H1'  | 18 | CYT | H6   | 3.27 | 4.12 |
| 18 | CYT | H5   | 17 | THY | H2'1 | 2.93 | 3.56 |
| 18 | CYT | H5   | 17 | THY | H2'2 | 3.31 | 4.96 |
| 18 | CYT | H6   | 17 | THY | H2'1 | 3.22 | 6.00 |
| 19 | Y   | H3x1 | 7  | X   | H2x2 | 2.71 | 3.35 |
| 20 | CYT | H5   | 19 | Y   | H2'1 | 3.42 | 5.46 |
| 20 | CYT | H2'2 | 20 | CYT | H1'  | 2.29 | 2.71 |
| 20 | CYT | H2'2 | 20 | CYT | H3'  | 2.85 | 3.53 |

|    |     |      |    |     |     |      |      |
|----|-----|------|----|-----|-----|------|------|
| 21 | THY | H2'1 | 21 | THY | H4' | 3.09 | 3.88 |
| 22 | ADE | H1'  | 22 | ADE | H3' | 3.46 | 4.48 |
| 23 | GUA | H8   | 22 | ADE | H8  | 3.64 | 5.23 |

## Class5

| res_# | res_name | atm_name | res_# | res_name | atm_name | low_bnd | up_bnd |
|-------|----------|----------|-------|----------|----------|---------|--------|
| 4     | ADE      | H8       | 3     | THY      | H1'      | 2.50    | 3.50   |
| 7     | X        | H8       | 7     | X        | H1'      | 3.19    | 4.06   |
| 8     | ADE      | H2       | 8     | ADE      | H1'      | 3.54    | 6.33   |
| 8     | ADE      | H8       | 8     | ADE      | H1'      | 3.50    | 5.44   |
| 14    | GUA      | H8       | 13    | GUA      | H1'      | 3.10    | 4.30   |
| 18    | CYT      | H6       | 18    | CYT      | H1'      | 3.27    | 4.44   |
| 19    | Y        | H3x1     | 7     | X        | M        | 3.92    | 5.73   |
| 19    | Y        | H8       | 18    | CYT      | H1'      | 3.56    | 6.26   |

| res_# | res_name | atm_name | res_# | res_name | atm_name | low_bnd | up_bnd |
|-------|----------|----------|-------|----------|----------|---------|--------|
| 1     | GUA      | H8       | 1     | GUA      | H4'      | 4.00    | 5.50   |
| 1     | GUA      | H8       | 2     | CYT      | H6       | 4.50    | 5.50   |
| 2     | CYT      | H6       | 1     | GUA      | H3'      | 4.00    | 5.50   |
| 2     | CYT      | H6       | 2     | CYT      | H3'      | 3.50    | 5.00   |
| 2     | CYT      | H1'      | 3     | THY      | M        | 3.50    | 5.00   |
| 3     | THY      | H6       | 2     | CYT      | H3'      | 4.00    | 5.50   |
| 3     | THY      | H6       | 3     | THY      | H3'      | 3.50    | 5.00   |
| 3     | THY      | H6       | 4     | ADE      | H8       | 4.50    | 5.50   |
| 4     | ADE      | H8       | 3     | THY      | H3'      | 4.50    | 5.50   |
| 4     | ADE      | H8       | 3     | THY      | H2'      | 3.00    | 4.00   |
| 4     | ADE      | H8       | 3     | THY      | H2''     | 2.00    | 3.50   |
| 4     | ADE      | H8       | 4     | ADE      | H1'      | 3.50    | 4.50   |

|    |     |     |    |     |      |      |      |
|----|-----|-----|----|-----|------|------|------|
| 4  | ADE | H8  | 4  | ADE | H3'  | 4.00 | 5.00 |
| 4  | ADE | H8  | 4  | ADE | H2'  | 2.00 | 4.00 |
| 4  | ADE | H8  | 4  | ADE | H2'' | 3.50 | 4.50 |
| 4  | ADE | H8  | 5  | GUA | H8   | 4.50 | 5.50 |
| 5  | GUA | H8  | 4  | ADE | H3'  | 4.50 | 5.50 |
| 5  | GUA | H8  | 5  | GUA | H4'  | 4.00 | 5.50 |
| 5  | GUA | H8  | 6  | CYT | H6   | 4.50 | 5.50 |
| 6  | CYT | H6  | 5  | GUA | H3'  | 4.50 | 5.50 |
| 6  | CYT | H6  | 5  | GUA | H2'  | 3.00 | 5.00 |
| 6  | CYT | H5  | 6  | CYT | H2'  | 4.00 | 5.00 |
| 6  | CYT | H6  | 7  | X   | H8   | 4.50 | 5.50 |
| 7  | X   | H8  | 6  | CYT | H1'  | 3.50 | 5.00 |
| 7  | X   | H8  | 6  | CYT | H3'  | 4.50 | 5.50 |
| 7  | X   | H8  | 8  | ADE | H8   | 4.50 | 5.50 |
| 8  | ADE | H1' | 7  | X   | H1x  | 3.00 | 6.00 |
| 8  | ADE | H8  | 7  | X   | H3'  | 4.50 | 5.50 |
| 8  | ADE | H8  | 7  | X   | M    | 4.00 | 5.50 |
| 8  | ADE | H2  | 8  | ADE | H1'  | 4.00 | 5.50 |
| 8  | ADE | H2  | 9  | GUA | H1'  | 4.00 | 5.50 |
| 8  | ADE | H8  | 9  | GUA | H8   | 4.50 | 5.50 |
| 8  | ADE | H2  | 17 | THY | H1'  | 4.00 | 5.50 |
| 8  | ADE | H2  | 18 | CYT | H1'  | 4.00 | 5.50 |
| 9  | GUA | H8  | 8  | ADE | H3'  | 4.50 | 5.50 |
| 9  | GUA | H8  | 9  | GUA | H4'  | 4.00 | 5.50 |
| 9  | GUA | H1' | 10 | THY | M    | 3.00 | 4.50 |
| 9  | GUA | H8  | 10 | THY | H6   | 4.50 | 5.50 |
| 10 | THY | H6  | 9  | GUA | H3'  | 4.00 | 5.50 |

|    |     |     |    |     |      |      |      |
|----|-----|-----|----|-----|------|------|------|
| 10 | THY | H6  | 10 | THY | H3'  | 3.50 | 5.00 |
| 10 | THY | H6  | 11 | CYT | H6   | 4.50 | 5.50 |
| 11 | CYT | H6  | 10 | THY | H3'  | 4.00 | 5.50 |
| 11 | CYT | H5  | 11 | CYT | H2'  | 3.50 | 5.00 |
| 11 | CYT | H6  | 11 | CYT | H3'  | 3.50 | 5.00 |
| 11 | CYT | H6  | 12 | CYT | H6   | 4.50 | 5.50 |
| 12 | CYT | H6  | 11 | CYT | H3'  | 4.00 | 5.50 |
| 13 | GUA | H8  | 13 | GUA | H4'  | 4.00 | 5.50 |
| 13 | GUA | H8  | 14 | GUA | H8   | 4.50 | 5.50 |
| 14 | GUA | H8  | 13 | GUA | H3'  | 4.50 | 5.50 |
| 14 | GUA | H8  | 15 | ADE | H8   | 4.50 | 5.50 |
| 15 | ADE | H2  | 10 | THY | H1'  | 4.00 | 5.50 |
| 15 | ADE | H2  | 11 | CYT | H1'  | 4.00 | 5.50 |
| 15 | ADE | H8  | 14 | GUA | H3'  | 4.50 | 5.50 |
| 15 | ADE | H2  | 15 | ADE | H1'  | 4.00 | 5.50 |
| 15 | ADE | H8  | 15 | ADE | H3'  | 4.00 | 5.00 |
| 15 | ADE | H8  | 15 | ADE | H4'  | 4.00 | 5.50 |
| 15 | ADE | H2  | 16 | CYT | H1'  | 3.70 | 5.50 |
| 15 | ADE | H2  | 16 | CYT | H2'' | 4.00 | 6.00 |
| 16 | CYT | H6  | 15 | ADE | H3'  | 4.50 | 5.50 |
| 16 | CYT | H6  | 16 | CYT | H4'  | 4.00 | 5.50 |
| 16 | CYT | H1' | 17 | THY | M    | 3.50 | 4.50 |
| 16 | CYT | H6  | 17 | THY | H6   | 4.50 | 5.50 |
| 17 | THY | H6  | 16 | CYT | H3'  | 4.00 | 5.50 |
| 18 | CYT | H5  | 17 | THY | M    | 4.00 | 5.00 |
| 18 | CYT | H6  | 17 | THY | H6   | 4.50 | 5.50 |
| 18 | CYT | H6  | 17 | THY | H3'  | 4.00 | 5.50 |

|    |     |     |    |     |      |      |      |
|----|-----|-----|----|-----|------|------|------|
| 19 | Y   | H1' | 7  | X   | H1x  | 3.00 | 6.00 |
| 19 | Y   | H8  | 18 | CYT | H6   | 4.50 | 5.50 |
| 19 | Y   | H8  | 18 | CYT | H3'  | 4.50 | 5.50 |
| 19 | Y   | H8  | 19 | Y   | H4'  | 4.00 | 5.50 |
| 20 | CYT | H1' | 7  | X   | M    | 3.00 | 6.00 |
| 20 | CYT | H1' | 7  | X   | H2x1 | 3.00 | 6.00 |
| 20 | CYT | H1' | 19 | Y   | H3x1 | 3.00 | 4.50 |
| 20 | CYT | H1' | 19 | Y   | H3x2 | 3.00 | 4.50 |
| 20 | CYT | H6  | 19 | Y   | H8   | 4.50 | 5.50 |
| 20 | CYT | H6  | 19 | Y   | H3'  | 4.50 | 5.50 |
| 20 | CYT | H6  | 20 | CYT | H1'  | 3.50 | 4.50 |
| 20 | CYT | H1' | 21 | THY | M    | 3.50 | 5.00 |
| 21 | THY | H6  | 20 | CYT | H1'  | 2.50 | 4.00 |
| 21 | THY | H6  | 20 | CYT | H3'  | 4.00 | 5.50 |
| 21 | THY | H6  | 21 | THY | H1'  | 3.50 | 4.50 |
| 22 | ADE | H8  | 21 | THY | H1'  | 2.50 | 3.50 |
| 22 | ADE | H8  | 21 | THY | H6   | 4.50 | 5.50 |
| 22 | ADE | H8  | 21 | THY | H3'  | 4.00 | 5.50 |
| 22 | ADE | H8  | 21 | THY | H2'  | 3.00 | 4.00 |
| 22 | ADE | H8  | 21 | THY | H2'' | 2.00 | 3.50 |
| 22 | ADE | H8  | 22 | ADE | H1'  | 3.50 | 4.50 |
| 22 | ADE | H8  | 22 | ADE | H3'  | 4.00 | 5.00 |
| 22 | ADE | H8  | 22 | ADE | H2'  | 2.00 | 4.00 |
| 22 | ADE | H8  | 22 | ADE | H2'' | 3.50 | 4.50 |
| 23 | GUA | H8  | 22 | ADE | H3'  | 4.50 | 5.50 |
| 23 | GUA | H8  | 23 | GUA | H4'  | 4.00 | 5.50 |
| 24 | CYT | H6  | 23 | GUA | H8   | 4.50 | 5.50 |

|    |     |    |    |     |     |      |      |
|----|-----|----|----|-----|-----|------|------|
| 24 | CYT | H6 | 23 | GUA | H3' | 4.50 | 5.50 |
|----|-----|----|----|-----|-----|------|------|



**Figure S1.** Parameterization of the 5'-Cp- $N^2$ -dG-3'- $R$ -( $\alpha$ )-CH<sub>3</sub>-propyl-5'-Cp- $N^2$ -dG-3' and Containing the 5'-Cp- $N^2$ -dG-3'- $S$ -( $\alpha$ )-CH<sub>3</sub>-propyl-5'-Cp- $N^2$ -dG-3' Inter-strand Cross-links **8a** and **8b** in the AMBER 8.0 Forcefield.

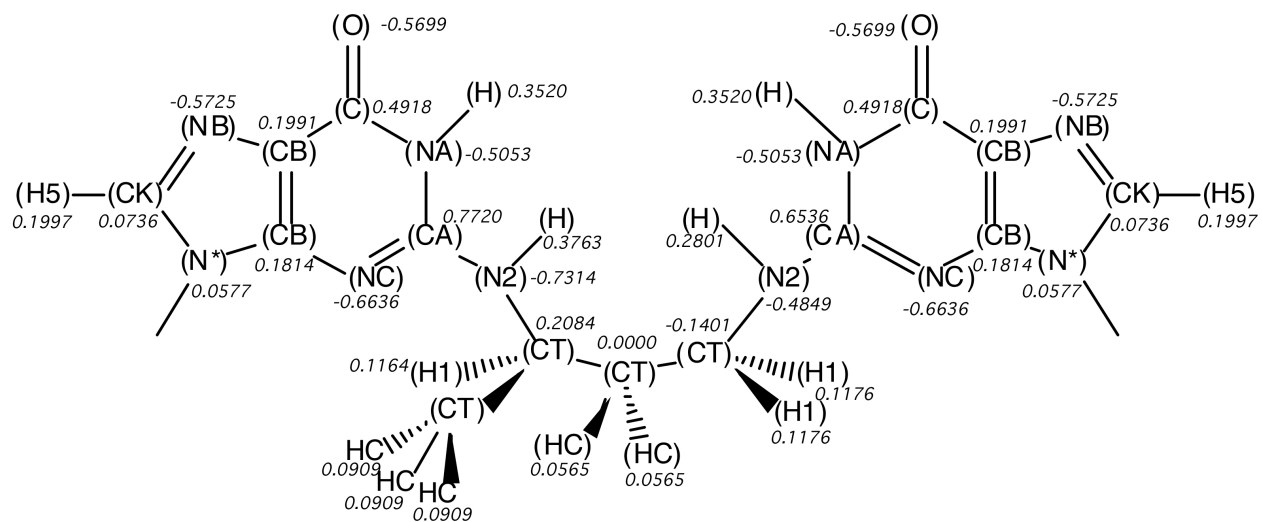

Supplement: NIHMS62044-supplement-si20060707_053.pdf [file NIHMS62044-supplement-si20060707_053.pdf]
